# Supplementary material for: Effects of the Ambient Fine Particulate Matter on Public Awareness of Lung Cancer Risk in China: Evidence from the Internet-Based Big Data Platform
Source: PubMed Central journal article supplement (PMC5645640; doi:10.2196/publichealth.8078), 2017-10-03
Supplement: publichealth_v3i4e64_app1.pdf [file publichealth_v3i4e64_app1.pdf]

|              | B&P               |        | B&M    |       | P&M    |       | B&P    |        |
|--------------|-------------------|--------|--------|-------|--------|-------|--------|--------|
|              | $r_s$             | $P$    | $r_s$  | $P$   | $r_s$  | $P$   | $r_s$  | $P$    |
| Beijing      | .111 <sup>a</sup> | <0.001 | 0.026  | 0.398 | 0.023  | 0.448 | 0.111  | <0.001 |
| Changchun    | 0.019             | 0.539  | 0.031  | 0.305 | -0.003 | 0.929 | 0.019  | 0.537  |
| Changsha     | .147 <sup>a</sup> | <0.001 | 0.024  | 0.432 | -0.013 | 0.675 | 0.147  | <0.001 |
| Chengdu      | -0.059            | 0.051  | 0.015  | 0.611 | -0.033 | 0.270 | -0.059 | 0.053  |
| Chongqing    | .088 <sup>a</sup> | 0.004  | 0.046  | 0.126 | -0.023 | 0.451 | 0.089  | 0.003  |
| Fuzhou       | .089 <sup>a</sup> | 0.003  | 0.032  | 0.292 | -0.006 | 0.833 | 0.089  | 0.003  |
| Guangzhou    | .142 <sup>a</sup> | <0.001 | 0.052  | 0.086 | 0.005  | 0.874 | 0.142  | <0.001 |
| Guiyang      | 0.024             | 0.426  | 0.044  | 0.148 | 0.023  | 0.441 | 0.023  | 0.445  |
| Harbin       | .148 <sup>a</sup> | <0.001 | 0.027  | 0.369 | -0.007 | 0.826 | 0.148  | <0.001 |
| Haikou       | 0.049             | 0.104  | -0.024 | 0.436 | -0.022 | 0.465 | 0.049  | 0.108  |
| Hangzhou     | .179 <sup>a</sup> | <0.001 | 0.017  | 0.569 | -0.004 | 0.893 | 0.179  | <0.001 |
| Hefei        | .181 <sup>a</sup> | <0.001 | 0.016  | 0.588 | -0.015 | 0.624 | 0.181  | <0.001 |
| Hohhot       | -0.002            | 0.958  | 0.037  | 0.217 | 0.016  | 0.591 | -0.002 | 0.942  |
| Jinan        | .134 <sup>a</sup> | <0.001 | 0.033  | 0.274 | -0.006 | 0.837 | 0.134  | <0.001 |
| Kunming      | 0.013             | 0.659  | 0.042  | 0.162 | -0.009 | 0.755 | 0.014  | 0.649  |
| Lanzhou      | 0.033             | 0.269  | 0.053  | 0.078 | -0.014 | 0.636 | 0.034  | 0.258  |
| Lasa         | 0.010             | 0.733  | -0.013 | 0.678 | -0.020 | 0.499 | 0.010  | 0.740  |
| Nanchang     | 0.026             | 0.397  | 0.013  | 0.657 | -0.025 | 0.411 | 0.026  | 0.391  |
| Nanjing      | .181 <sup>a</sup> | <0.001 | <0.001 | 0.993 | -0.023 | 0.445 | 0.181  | <0.001 |
| Nanning      | 0.019             | 0.529  | 0.033  | 0.281 | -0.009 | 0.774 | 0.019  | 0.523  |
| Shanghai     | 0.026             | 0.385  | 0.025  | 0.415 | -0.013 | 0.659 | 0.027  | 0.379  |
| Shenyang     | .064 <sup>b</sup> | 0.034  | 0.016  | 0.606 | -0.002 | 0.952 | 0.064  | 0.034  |
| Shijiazhuang | .178 <sup>a</sup> | <0.001 | 0.015  | 0.627 | -0.007 | 0.808 | 0.178  | <0.001 |
| Taiyuan      | 0.038             | 0.203  | 0.046  | 0.124 | 0.017  | 0.573 | 0.038  | 0.212  |
| Tianjin      | .121 <sup>a</sup> | <0.001 | 0.013  | 0.662 | -0.006 | 0.846 | 0.121  | <0.001 |
| Urumqi       | .089 <sup>a</sup> | 0.003  | 0.021  | 0.482 | -0.024 | 0.432 | 0.089  | 0.003  |
| Wuhan        | .077 <sup>b</sup> | 0.011  | 0.014  | 0.638 | -0.020 | 0.499 | 0.077  | 0.010  |
| Xian         | .073 <sup>b</sup> | 0.016  | 0.030  | 0.321 | 0.001  | 0.979 | 0.073  | 0.016  |
| Xining       | 0.042             | 0.160  | 0.001  | 0.969 | -0.023 | 0.449 | 0.043  | 0.160  |
| Yinchuan     | -0.029            | 0.335  | -0.027 | 0.367 | 0.014  | 0.654 | -0.029 | 0.342  |
| Zhengzhou    | .146 <sup>a</sup> | <0.001 | 0.031  | 0.310 | -0.001 | 0.986 | 0.146  | <0.001 |

**Table 1. The Pearson correlation between the daily Baidu Index for the term “lung cancer”(B), the daily Baidu media index of lung cancer (M) and the daily PM<sub>2.5</sub> concentrations(P)**

Note: <sup>a</sup> Correlation is significant at the 0.01 level (2-tailed).

<sup>b</sup> Correlation is significant at the 0.05 level (2-tailed).
