# Supplementary material for: Effects of the Ambient Fine Particulate Matter on Public Awareness of Lung Cancer Risk in China: Evidence from the Internet-Based Big Data Platform
Source: PubMed Central journal article supplement (PMC5645640; doi:10.2196/publichealth.8078), 2017-10-03
Supplement: publichealth_v3i4e64_app2.pdf [file publichealth_v3i4e64_app2.pdf]

**Table 1. The results of the multiple liner regression analysis (Dependent variable Y:the daily Baidu index for the term “lung cancer”, Independent variable X and M: the daily Baidu media index and the daily PM2.5 concentration)**

| City      | Model      | B       | SE    | Beta   | t       | Sig.  | Correlations |         |        |
|-----------|------------|---------|-------|--------|---------|-------|--------------|---------|--------|
|           |            |         |       |        |         |       | Zero-order   | Partial | Part   |
| Beijing   | (Constant) | 398.606 | 3.207 |        |         |       |              |         |        |
|           | X          | 0.113   | 0.031 | 0.111  | 3.68    | 0     | 0.111        | 0.111   | 0.111  |
|           | M          | 0.008   | 0.01  | 0.023  | 0.766   | 0.444 | 0.026        | 0.023   | 0.023  |
| Changchun | (Constant) | 145.449 | 1.327 |        | 109.616 | 0     |              |         |        |
|           | X          | 0.011   | 0.017 | 0.019  | 0.617   | 0.537 | 0.019        | 0.019   | 0.019  |
|           | M          | 0.004   | 0.004 | 0.031  | 1.027   | 0.305 | 0.031        | 0.031   | 0.031  |
| Changsha  | (Constant) | 187.754 | 1.757 |        | 106.841 | 0     |              |         |        |
|           | X          | 0.116   | 0.024 | 0.147  | 4.914   | 0     | 0.147        | 0.147   | 0.147  |
|           | M          | 0.004   | 0.005 | 0.026  | 0.856   | 0.392 | 0.024        | 0.026   | 0.026  |
| Chengdu   | (Constant) | 282.406 | 3.2   |        | 88.24   | 0     |              |         |        |
|           | X          | -0.078  | 0.04  | -0.059 | -1.939  | 0.053 | -0.059       | -0.059  | -0.059 |
|           | M          | 0.004   | 0.009 | 0.013  | 0.445   | 0.656 | 0.015        | 0.013   | 0.013  |
| Chongqing | (Constant) | 204.661 | 1.45  |        | 141.128 | 0     |              |         |        |
|           | X          | 0.064   | 0.022 | 0.089  | 2.948   | 0.003 | 0.088        | 0.089   | 0.089  |
|           | M          | 0.006   | 0.004 | 0.048  | 1.602   | 0.11  | 0.046        | 0.048   | 0.048  |
| Fuzhou    | (Constant) | 159.915 | 1.761 |        | 90.818  | 0     |              |         |        |
|           | X          | 0.155   | 0.053 | 0.089  | 2.942   | 0.003 | 0.089        | 0.089   | 0.089  |
|           | M          | 0.004   | 0.004 | 0.033  | 1.077   | 0.282 | 0.032        | 0.033   | 0.033  |
| Guangzhou | (Constant) | 274.074 | 2.588 |        | 105.91  | 0     |              |         |        |
|           | X          | 0.265   | 0.056 | 0.142  | 4.744   | 0     | 0.142        | 0.142   | 0.142  |
|           | M          | 0.01    | 0.006 | 0.051  | 1.713   | 0.087 | 0.052        | 0.052   | 0.051  |
| Guiyang   | (Constant) | 120.454 | 1.898 |        | 63.449  | 0     |              |         |        |
|           | X          | 0.032   | 0.042 | 0.023  | 0.764   | 0.445 | 0.024        | 0.023   | 0.023  |

| City     | Model      | B       | SE    | Beta   | t       | Sig.  | Correlations |         |        |
|----------|------------|---------|-------|--------|---------|-------|--------------|---------|--------|
|          |            |         |       |        |         |       | Zero-order   | Partial | Part   |
| Haerbin  | M          | 0.006   | 0.004 | 0.043  | 1.431   | 0.153 | 0.044        | 0.043   | 0.043  |
|          | (Constant) | 164.863 | 1.022 |        | 161.257 | 0     |              |         |        |
| Haikou   | X          | 0.055   | 0.011 | 0.148  | 4.941   | 0     | 0.148        | 0.148   | 0.148  |
|          | M          | 0.003   | 0.004 | 0.028  | 0.941   | 0.347 | 0.027        | 0.028   | 0.028  |
| Hangzhou | (Constant) | 109.363 | 1.602 |        | 68.277  | 0     |              |         |        |
|          | X          | 0.097   | 0.06  | 0.049  | 1.611   | 0.108 | 0.049        | 0.049   | 0.049  |
| Hefei    | M          | -0.003  | 0.005 | -0.022 | -0.744  | 0.457 | -0.024       | -0.022  | -0.022 |
|          | (Constant) | 236.41  | 2.6   |        | 90.917  | 0     |              |         |        |
| Huhehot  | X          | 0.247   | 0.041 | 0.179  | 6.006   | 0     | 0.179        | 0.179   | 0.179  |
|          | M          | 0.004   | 0.006 | 0.018  | 0.603   | 0.547 | 0.017        | 0.018   | 0.018  |
| Jinan    | (Constant) | 178.222 | 1.801 |        | 98.965  | 0     |              |         |        |
|          | X          | 0.138   | 0.023 | 0.181  | 6.086   | 0     | 0.181        | 0.181   | 0.181  |
| Kunming  | M          | 0.003   | 0.005 | 0.019  | 0.641   | 0.522 | 0.016        | 0.019   | 0.019  |
|          | (Constant) | 124.203 | 1.497 |        | 82.953  | 0     |              |         |        |
| Lanzhou  | X          | -0.002  | 0.028 | -0.002 | -0.073  | 0.942 | -0.002       | -0.002  | -0.002 |
|          | M          | 0.006   | 0.005 | 0.037  | 1.237   | 0.216 | 0.037        | 0.037   | 0.037  |
| Lanzhou  | (Constant) | 189.677 | 1.729 |        | 109.706 | 0     |              |         |        |
|          | X          | 0.078   | 0.017 | 0.134  | 4.471   | 0     | 0.134        | 0.134   | 0.134  |
| Lanzhou  | M          | 0.005   | 0.004 | 0.034  | 1.131   | 0.258 | 0.033        | 0.034   | 0.034  |
|          | (Constant) | 155.677 | 2.081 |        | 74.792  | 0     |              |         |        |
| Lanzhou  | X          | 0.029   | 0.064 | 0.014  | 0.455   | 0.649 | 0.013        | 0.014   | 0.014  |
|          | M          | 0.006   | 0.004 | 0.042  | 1.404   | 0.161 | 0.042        | 0.042   | 0.042  |
| Lanzhou  | (Constant) | 114.795 | 2.133 |        | 53.822  | 0     |              |         |        |
|          | X          | 0.04    | 0.035 | 0.034  | 1.133   | 0.258 | 0.033        | 0.034   | 0.034  |
| Lanzhou  | M          | 0.009   | 0.005 | 0.054  | 1.78    | 0.075 | 0.053        | 0.054   | 0.054  |

| City         | Model      | B       | SE    | Beta   | t       | Sig.  | Correlations |         |        |
|--------------|------------|---------|-------|--------|---------|-------|--------------|---------|--------|
|              |            |         |       |        |         |       | Zero-order   | Partial | Part   |
| Lasa         | (Constant) | 25.387  | 2.196 |        | 11.563  | 0     |              |         |        |
|              | X          | 0.026   | 0.078 | 0.01   | 0.332   | 0.74  | 0.01         | 0.01    | 0.01   |
|              | M          | -0.002  | 0.005 | -0.012 | -0.409  | 0.683 | -0.013       | -0.012  | -0.012 |
| Nanchang     | (Constant) | 147.336 | 1.737 |        | 84.835  | 0     |              |         |        |
|              | X          | 0.027   | 0.032 | 0.026  | 0.859   | 0.391 | 0.026        | 0.026   | 0.026  |
|              | M          | 0.002   | 0.005 | 0.014  | 0.465   | 0.642 | 0.013        | 0.014   | 0.014  |
| Nanjing      | (Constant) | 182.034 | 1.418 |        | 128.333 | 0     |              |         |        |
|              | X          | 0.123   | 0.02  | 0.181  | 6.088   | 0     | 0.181        | 0.181   | 0.181  |
|              | M          | 0.001   | 0.004 | 0.004  | 0.149   | 0.881 | 0            | 0.005   | 0.004  |
| Nanning      | (Constant) | 142.311 | 1.579 |        | 90.152  | 0     |              |         |        |
|              | X          | 0.02    | 0.031 | 0.019  | 0.639   | 0.523 | 0.019        | 0.019   | 0.019  |
|              | M          | 0.005   | 0.004 | 0.033  | 1.083   | 0.279 | 0.033        | 0.033   | 0.033  |
| Shanghai     | (Constant) | 333.046 | 2.933 |        | 113.549 | 0     |              |         |        |
|              | X          | 0.043   | 0.049 | 0.027  | 0.88    | 0.379 | 0.026        | 0.027   | 0.027  |
|              | M          | 0.006   | 0.008 | 0.025  | 0.826   | 0.409 | 0.025        | 0.025   | 0.025  |
| Shenyang     | (Constant) | 169.278 | 1.195 |        | 141.654 | 0     |              |         |        |
|              | X          | 0.03    | 0.014 | 0.064  | 2.121   | 0.034 | 0.064        | 0.064   | 0.064  |
|              | M          | 0.002   | 0.004 | 0.016  | 0.521   | 0.602 | 0.016        | 0.016   | 0.016  |
| Shijiazhaung | (Constant) | 168.925 | 1.517 |        | 111.375 | 0     |              |         |        |
|              | X          | 0.066   | 0.011 | 0.178  | 5.986   | 0     | 0.178        | 0.178   | 0.178  |
|              | M          | 0.003   | 0.005 | 0.016  | 0.537   | 0.591 | 0.015        | 0.016   | 0.016  |
| Taiyuan      | (Constant) | 147.65  | 1.702 |        | 86.758  | 0     |              |         |        |
|              | X          | 0.027   | 0.021 | 0.038  | 1.248   | 0.212 | 0.038        | 0.038   | 0.038  |
|              | M          | 0.007   | 0.005 | 0.046  | 1.516   | 0.13  | 0.046        | 0.046   | 0.046  |
| Tianjin      | (Constant) | 199.702 | 1.285 |        | 155.398 | 0     |              |         |        |

| City      | Model      | B       | SE    | Beta   | t       | Sig.  | Correlations |         |        |
|-----------|------------|---------|-------|--------|---------|-------|--------------|---------|--------|
|           |            |         |       |        |         |       | Zero-order   | Partial | Part   |
| Urumuqi   | X          | 0.056   | 0.014 | 0.121  | 4.041   | 0     | 0.121        | 0.121   | 0.121  |
|           | M          | 0.002   | 0.004 | 0.014  | 0.464   | 0.643 | 0.013        | 0.014   | 0.014  |
|           | (Constant) | 112.829 | 1.343 |        | 83.989  | 0     |              |         |        |
| Wuhan     | X          | 0.044   | 0.015 | 0.089  | 2.969   | 0.003 | 0.089        | 0.089   | 0.089  |
|           | M          | 0.003   | 0.004 | 0.023  | 0.776   | 0.438 | 0.021        | 0.023   | 0.023  |
|           | (Constant) | 223.796 | 1.435 |        | 155.977 | 0     |              |         |        |
| Xian      | X          | 0.044   | 0.017 | 0.077  | 2.564   | 0.01  | 0.077        | 0.077   | 0.077  |
|           | M          | 0.002   | 0.004 | 0.016  | 0.524   | 0.6   | 0.014        | 0.016   | 0.016  |
|           | (Constant) | 204.587 | 1.438 |        | 142.304 | 0     |              |         |        |
| Xining    | X          | 0.04    | 0.016 | 0.073  | 2.414   | 0.016 | 0.073        | 0.073   | 0.073  |
|           | M          | 0.004   | 0.004 | 0.03   | 0.992   | 0.321 | 0.03         | 0.03    | 0.03   |
|           | (Constant) | 70.686  | 2.129 |        | 33.209  | 0     |              |         |        |
| Yinchuan  | X          | 0.052   | 0.037 | 0.043  | 1.406   | 0.16  | 0.042        | 0.043   | 0.043  |
|           | M          | 0       | 0.004 | 0.002  | 0.071   | 0.943 | 0.001        | 0.002   | 0.002  |
|           | (Constant) | 83.055  | 1.75  |        | 47.453  | 0     |              |         |        |
| Zhengzhou | X          | -0.028  | 0.03  | -0.029 | -0.952  | 0.342 | -0.029       | -0.029  | -0.029 |
|           | M          | -0.004  | 0.005 | -0.027 | -0.89   | 0.373 | -0.027       | -0.027  | -0.027 |
|           | (Constant) | 216.278 | 1.55  |        | 139.538 | 0     |              |         |        |
| Zhengzhou | X          | 0.071   | 0.015 | 0.146  | 4.889   | 0     | 0.146        | 0.146   | 0.146  |
|           | M          | 0.004   | 0.004 | 0.031  | 1.028   | 0.304 | 0.031        | 0.031   | 0.031  |
